# Supplementary material
Source: MDPI journal article supplement (https://www.mdpi.com/2071-1050/14/13/7760)
Supplement: s1 [file s1]

## Supporting Information for

# Synthesis and Characterization of Zero-Valent Fe-Cu and Fe-Ni Bimetals for the Dehalogenation of Trichloroethylene Vapors

Clarissa Settimi <sup>1</sup>, Daniela Zingaretti <sup>1,\*</sup>, Simone Sanna <sup>1</sup>, Iason Verginelli <sup>1</sup>, Igor Luisetto <sup>2</sup>, Antonello Tebano <sup>1</sup> and Renato Baciocchi <sup>1</sup>

<sup>1</sup> Department of Civil Engineering and Computer Science Engineering, University of Rome "Tor Vergata", Via del Politecnico 1, 00133 Rome, Italy; settimi@ing.uniroma2.it (C.S.); sanna@ing.uniroma2.it (S.S.); verginelli@ing.uniroma2.it (I.V.); tebano@ing.uniroma2.it (A.T.); baciocchi@ing.uniroma2.it (R.B.)

<sup>2</sup> Department of Energy Technologies and Renewable Sources, ENEA Research Center, Casaccia, Via Anguillarese, 301, 00123 Rome, Italy; igor.luisetto@enea.it

\* Correspondence: zingaretti@ing.uniroma2.it; Tel.: +39-06-72597741, Fax: +39-06-72597021

Bimetal Fe-1%Cu

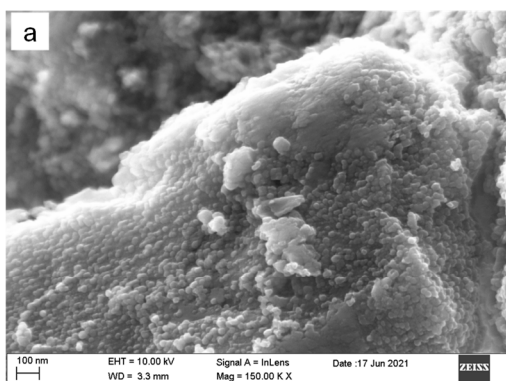

Bimetal Fe-1%Ni

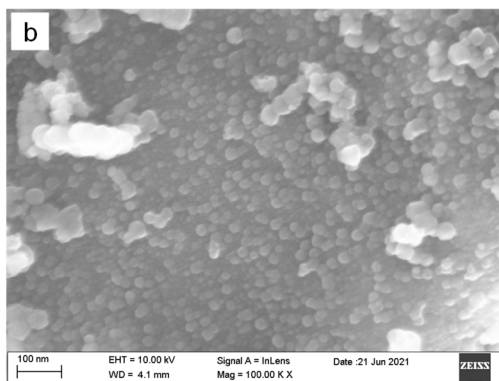

Bimetal Fe-5%Cu

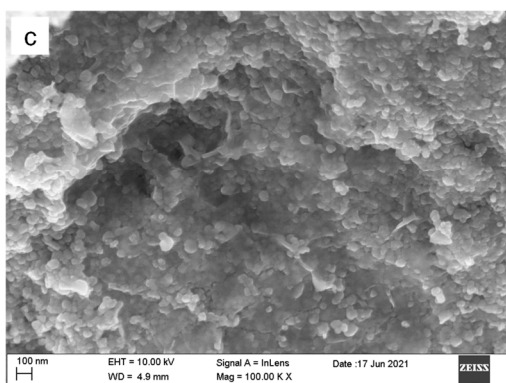

Bimetal Fe-5%Ni

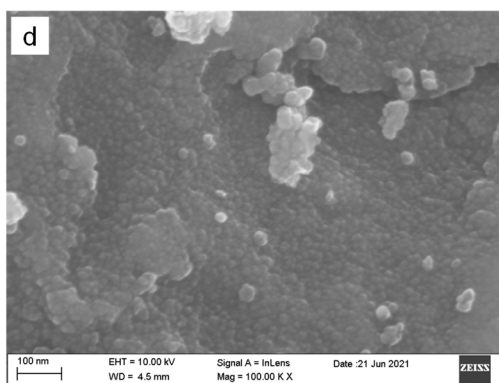

Bimetal Fe-20%Cu

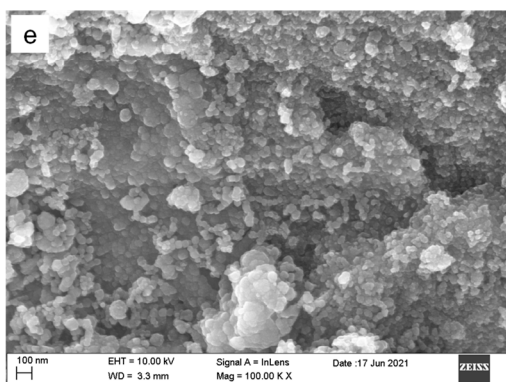

Bimetal Fe-20%Ni

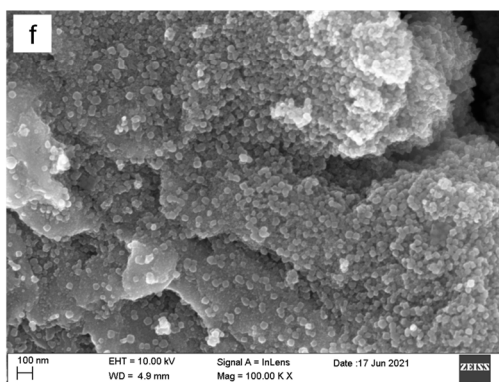

Figure S1: SEM images of Fe-Cu and Fe-Ni bimetals at high magnification: Fe-1%Cu (a), Fe- 5-%Cu (c), Fe-20%Cu (e), Fe-1%Ni (b), Fe-5%Ni (d), Fe-20%Ni (f)

### Mixture Fe-5%Cu\*

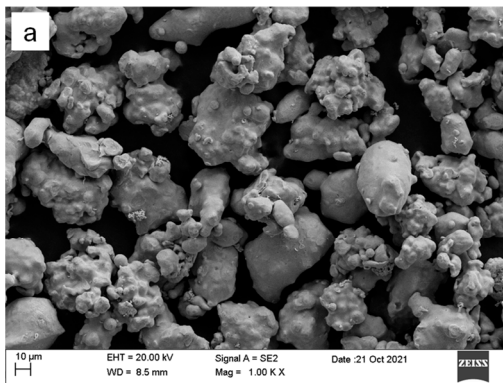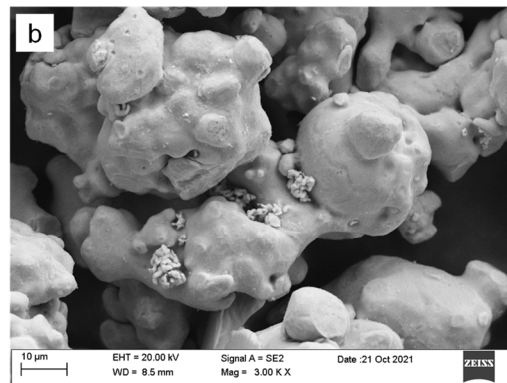

### Mixture Fe-5%Ni\*

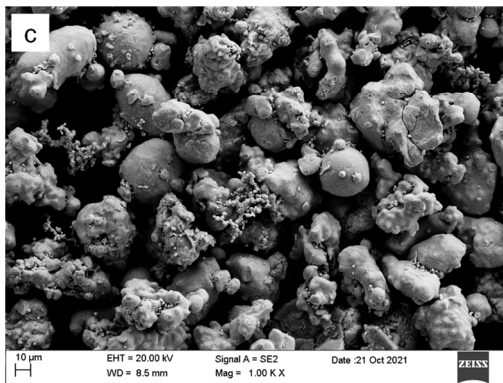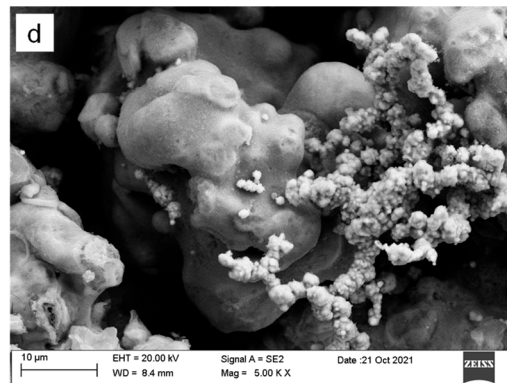

Figure S2: SEM images of Fe-5%Cu\* (a,b) and Fe-5%Ni\*(c,d) mixtures

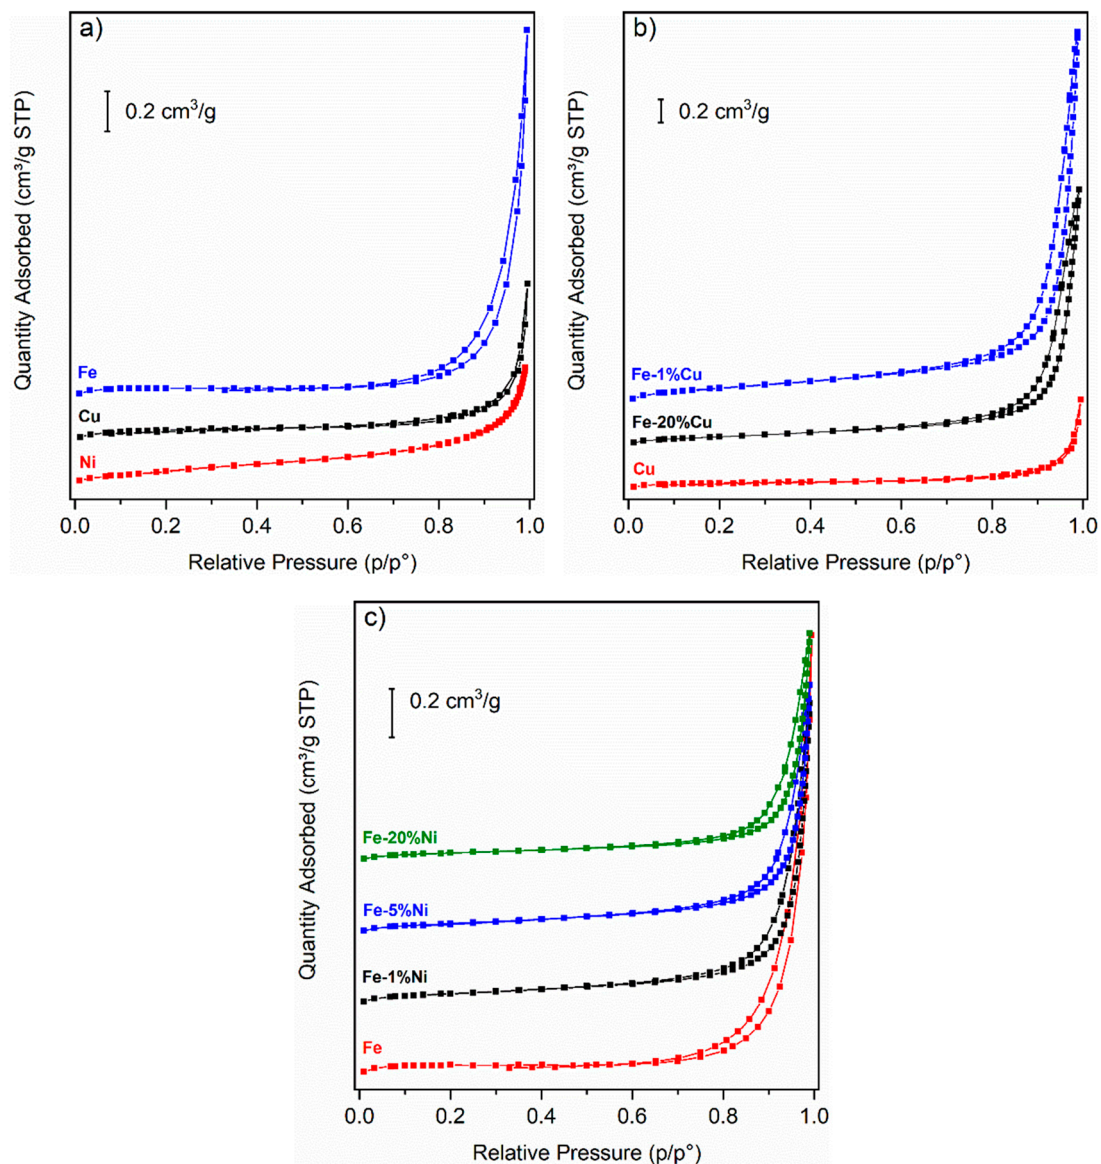

Figure S3: Adsorption-desorption isotherms of  $N_2$  for the samples: Fe, Cu, Ni (a); Cu, Fe-1% Cu, Fe-20% Cu (b); Fe, Fe-1% Ni, Fe-5% Ni, Fe-20% Ni (c). Note that data for the Fe-5%Cu sample are not reported as lower than the LOQ.
